# Supplementary material
Source: PubMed Central journal article supplement (PMC6088788)
Supplement: NIHMS984397-supplement-Supplemental_materials.pdf [file NIHMS984397-supplement-Supplemental_materials.pdf]

## **SUPPLEMENTAL INFORMATION**

### **Supplementary Figures**

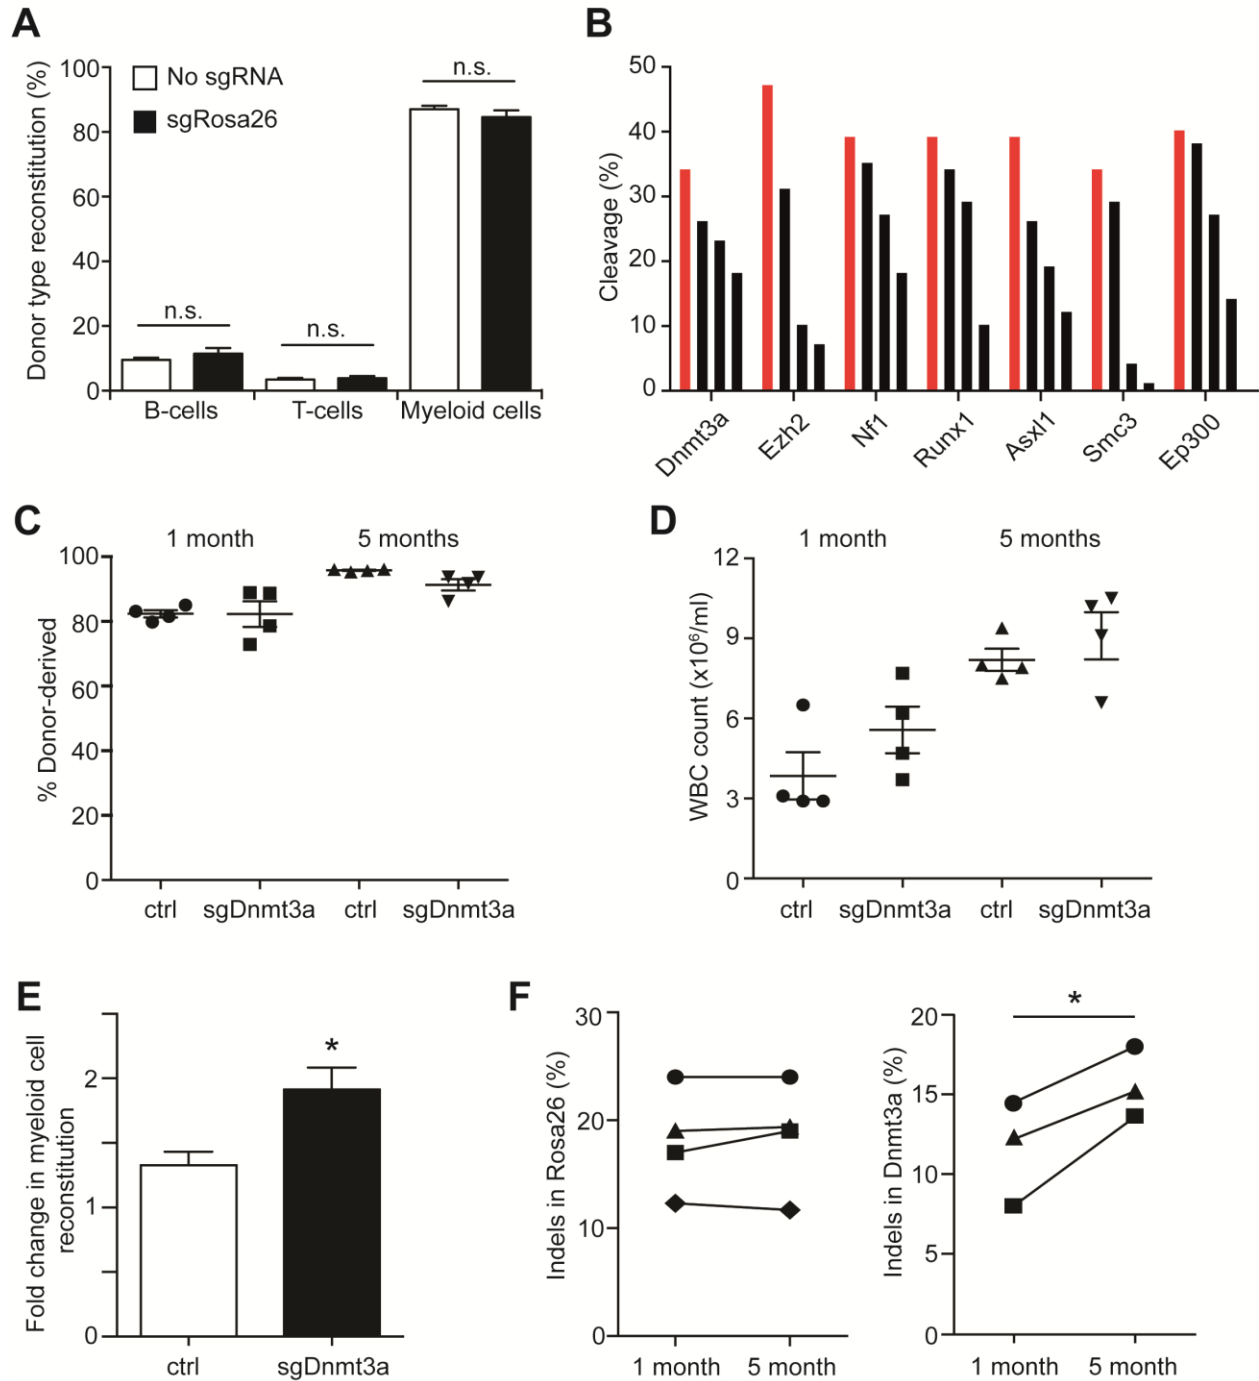

**Figure S1**

**Figure S1 (Related to Figure 1). Efficient genome editing of genes by a RNP-based CRISPR/Cas9 delivery method. (A)** Reconstitution levels by gene edited LSK cells at 5 months after transplantation. No differences in lineage contribution or reconstitution levels were

observed (n=4). **(B)** Cleavage efficiency of four sgRNAs designed per gene as determined by T7 endonuclease assays. sgRNAs represented by the red bars showed the highest efficiency and are used in the subsequent experiments (n=3 independent experiments). **(C)** Donor-derived chimerism of control and sgDnmt3a-edited HSPCs cells at 1 and 5 months after transplantation (n=4). **(D)** WBC counts in recipient mice transplanted with control and sgDnmt3a-edited HSPCs at 1 and 5 months after transplantation (n=4). **(E)** Fold change in the level of donor-type myeloid cell reconstitution at 5 months compared to 1 month for both ctrl and sgDnmt3a mice (4 mice per group). **(F)** Frequencies of indels in Rosa26 (n=4) and Dnmt3a (n=3) at 1 and 5 months after transplantation, as determined by TIDE analysis). All data represent mean±SEM; \*, p<0.05 by Student's t-test.

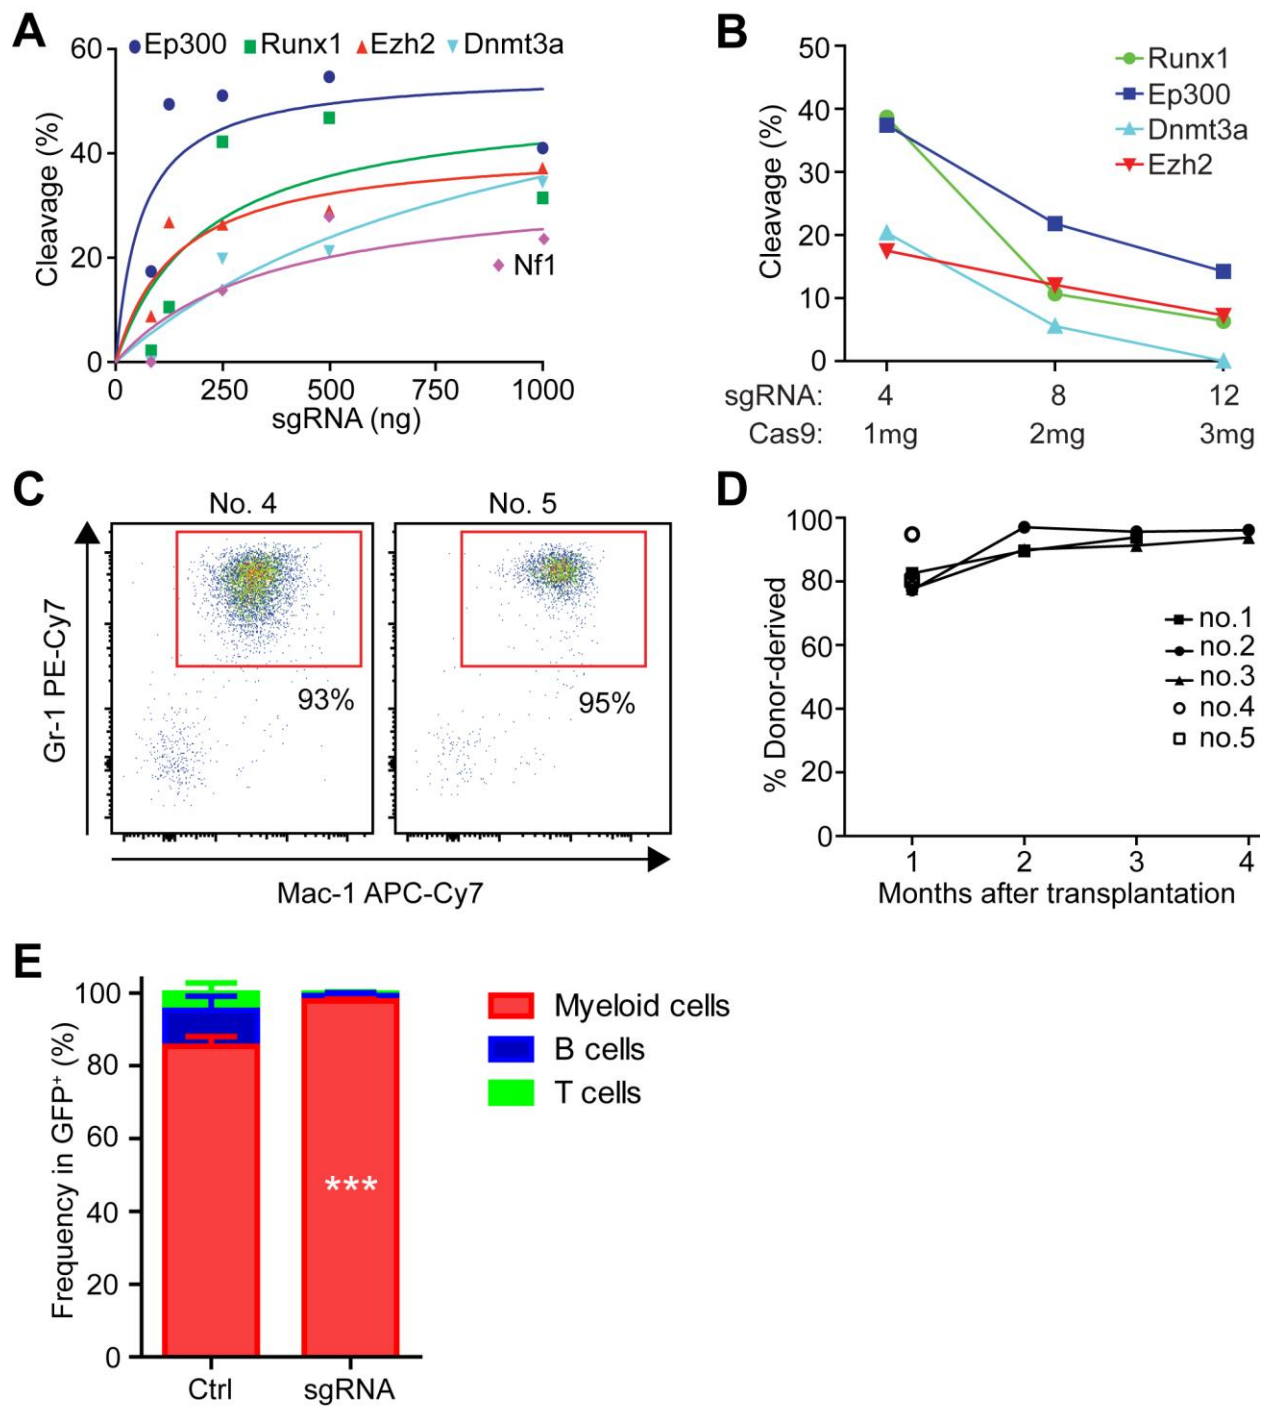

**Figure S2**

**Figure S2 (Related to Figure 2). Expansion of myeloid cells after multiplex gene targeting.**

(A) Representative dose-dependent curve of cleavage activity for increased amount of sgRNA mixed with 1 $\mu$ g of Cas9. (B) Representative dose-dependent curve of cleavage activity for

increased amount of RNP complex. The amounts of RNP complex tested in this experiment were 4 sgRNAs (250ng for each) with 1 $\mu$ g Cas9; 8 sgRNAs (250ng for each) with 2 $\mu$ g Cas9, and 12 sgRNAs (250ng for each) with 3 $\mu$ g Cas9. The cleavage efficiency was performed by T7 endonuclease assay and calculated by Image J software (n=3). **(C)** Flow cytometry showing the expansion of Mac-1<sup>+</sup>Gr-1<sup>+</sup> myeloid cell in the peripheral blood after 1 month of transplantation in mouse no. 4 and 5. **(D)** The levels of donor-derived chimerism in the indicated mice. All mice exhibited high donor-derived chimerism. **(E)** Relative frequencies of myeloid cells, B-cells, and T-cells at 1 to 4 months after transplantation of control cells or LSK cells after multiplex editing (mouse no. 2, 3, 4 and 5).

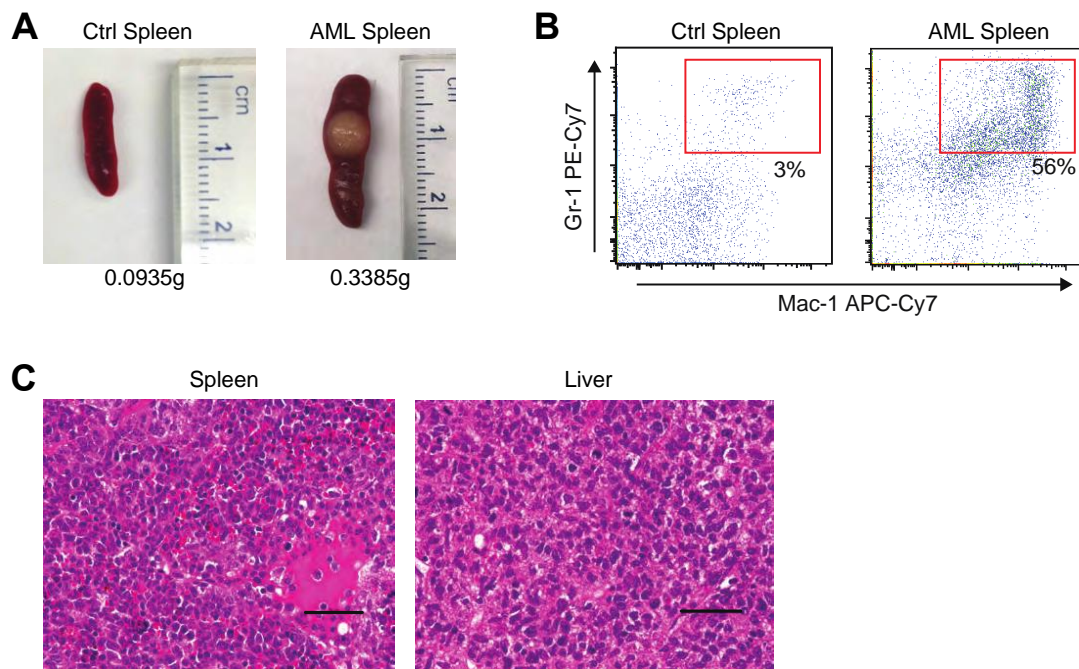

**Figure S3**

**Figure S3 (Related to Figure 3). Characterization of the AML mice.** (A) Images of the spleens of control and a mouse that developed AML. The weights of the spleens are indicated below. (B) Flow cytometry plots showing the expansion of Mac-1<sup>+</sup>Gr-1<sup>+</sup> myeloid cell in the spleens of control and AML mouse. (C) H&E staining of the spleen and liver sections showing infiltration of myeloid cells in secondary recipient mice (n=3 mice, representative images from one mouse are shown). Scale bar, 50 $\mu$ m.



profile as the dominant mutation discovered by high-throughput sequencing of the bulk of AML cells (Figure 3F). **(D)** Genotyping of colonies derived from single L-GMPs. All colonies had the identical mutation profile as the dominant mutation discovered by high-throughput sequencing of the bulk of AML cells (Figure 3F). **(E)** Serial re-plating capacity of normal bone marrow cells compared to the AML bone marrow cells. **(F)** Survival curve of secondary recipient mice transplanted with 50,000 GMP cells from primary AML mice (n=10).



**Table S1. Oligos used in the study**

| <b>Oligos</b>                             | <b>Sequences</b>                                                                    |
|-------------------------------------------|-------------------------------------------------------------------------------------|
| <b>sgRNA production</b>                   |                                                                                     |
| sgRNA common reverse primer (overlap PCR) | AAAAGCACCGACTCGGTGCCACTTTTTCAAGTTGATAACGGACTA<br>GCCTTATTTTAACTTGCTATTTCTAGCTCTAAAC |
| sgRNA common reverse primer (regular PCR) | AGCACCGACTCGGTGCCACT                                                                |
| sgDnmt3a (Exon 23)                        | taatacgactcactataGGGACGTCTGTGTAGTGGACgtttaagagctatgctgga<br>aacagc                  |
| sgEzh2 (Exon 10)                          | taatacgactcactataGGGCCCCCTGGGCGTTTAGGgtttaagagctatgctgg<br>aacagc                   |
| sgNf1 (Exon 32)                           | taatacgactcactataGGGAAACATGGCACTTCCTAgtttaagagctatgctgga<br>aacagc                  |
| sgRunx1 (Exon 4)                          | taatacgactcactataGGGCACTCTGGTCACCGTCAgtttaagagctatgctgg<br>aacagc                   |
| sgAsxl1 (Exon 8)                          | taatacgactcactataGGCTTCCGGAAGCCAGCCACgtttaagagctatgctgg<br>aacagc                   |
| sgSmc3 (Exon 19)                          | taatacgactcactataGGCCAGTCAGAGCACCTCGAgtttaagagctatgctgg<br>aacagc                   |
| sgEp300 (Exon 4)                          | taatacgactcactataGGGCCGGGAGCAAGCTAATGgtttaagagctatgctgg<br>aacagc                   |
| sgRosa26 (Intron 1)                       | taatacgactcactataGGGGTCGGCCTCTGGCGGGGgtttaagagctatgctg<br>gaaacagc                  |
| <b>T7EI/Seq Primers</b>                   |                                                                                     |
| Dnmt3a-F                                  | TCTTTATACCCACAGAGAGGCTG                                                             |
| Dnmt3a-R                                  | TCATCACTACTTCAGTTTGCCCC                                                             |
| Ezh2-F                                    | GGAGGGAGCTAAGGAGTTTGC                                                               |
| Ezh2-R                                    | TGTCTTACCAGAGGAGCTGGA                                                               |
| Nf1-F1                                    | TCCTCCTCCTCAGGTGGTTA                                                                |
| Nf1-R1                                    | TTCAAGCCCCTTTCAATTCT                                                                |
| Nf1-F2                                    | TTGAGGTATGTGGAGCGTGG                                                                |
| Nf1-R2                                    | CAAAGGCACATAACTGAAGCAA                                                              |
| Runx1-F                                   | ACAAATGACACAGCCAGGTG                                                                |
| Runx1-R                                   | GGTCGTTGAATCTCGCTACC                                                                |
| Asxl1-F                                   | GAGAGTGGCAGTCCATCGAG                                                                |
| Asxl1-R                                   | GAGCACGGAGTTGGTGTTA                                                                 |
| Smc3-F                                    | TGGAGGCTGGTAAAGAGAACG                                                               |
| Smc3-R                                    | TTTCTCTGCAGTCCCGTCAC                                                                |
| Ep300-F                                   | CACACACAGCTGATCCAGAGA                                                               |
| Ep300-R                                   | ACTCACCTTGGCAGGATTTG                                                                |
| Rosa26-F                                  | AGCTGCAGTGGAGTAGGCG                                                                 |
| Rosa26-R                                  | CACACCAGGTTAGCCTTTAAGCC                                                             |

**Table S2. Hematological phenotypes of transplanted mice in the study**

| <b>Mouse No.</b> | <b>Hematological phenotype</b> |
|------------------|--------------------------------|
| 1                | AML                            |
| 2                | Anemia                         |
| 3                | Anemia                         |
| 4                | Anemia                         |
| 5                | Anemia                         |
| 6                | CHIP                           |
| 7                | CHIP                           |
| 8                | CHIP                           |
| 9                | CHIP                           |
| 10               | CHIP                           |
| 11               | CHIP                           |
| 12               | CHIP                           |
